# Supplementary material
Source: PubMed Central journal article supplement (PMC4729651)
Supplement: NIHMS743997-supplement-The_role_of_erythrocyte_CD47_in_intracerebral_hematoma_clearance.pdf [file NIHMS743997-supplement-The_role_of_erythrocyte_CD47_in_intracerebral_hematoma_clearance.pdf]

## SUPPLEMENTAL MATERIALS

**Title: The role of erythrocyte CD47 in intracerebral hematoma clearance**

### Supplemental Figures

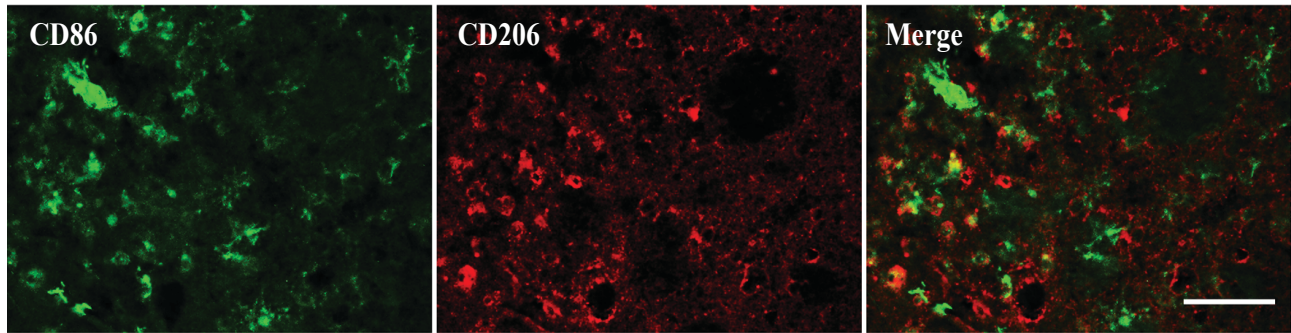

**Supplemental Figure I:** Double labeling of CD86 and CD206 in the peri-hematoma area at day-3 after 30 $\mu$ l blood injected into right basal ganglia, scale bar = 50 $\mu$ m.

The primary antibodies were: polyclonal rabbit anti-CD206 IgG (Abcam, USA, 1:200 dilution) and monoclonal rat anti-CD86 IgG (Thermo Scientific, USA; 1:100 dilution). The secondary antibodies were Alexa Fluor 594-conjugated donkey anti-rabbit mAb and Alexa Fluor 488-conjugated donkey anti-rat mAb (Invitrogen, Grand Island, NY, USA; both at a 1:500 dilution).

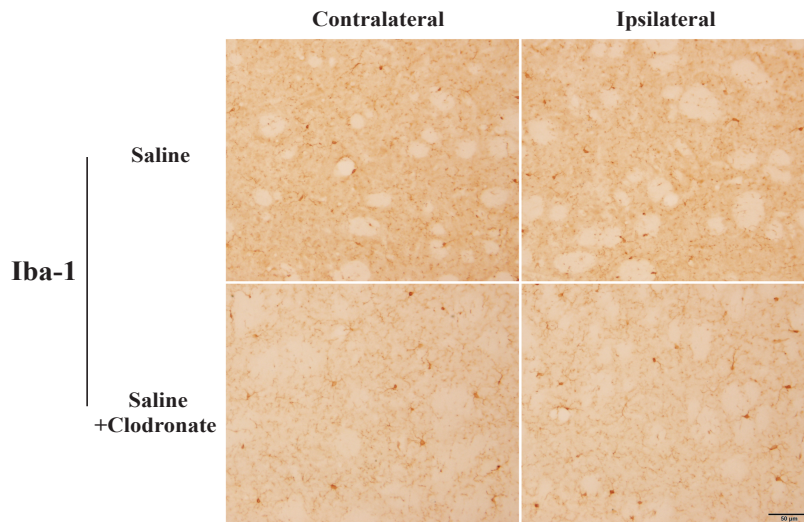

**Supplemental Figure II:** Immunoreactivity of Iba-1 in the ipsilateral basal ganglia at day-3 after injection of 30 $\mu$ l saline with or without 5 $\mu$ l clodronate liposome into the right basal ganglia, scale bar = 50 $\mu$ m.

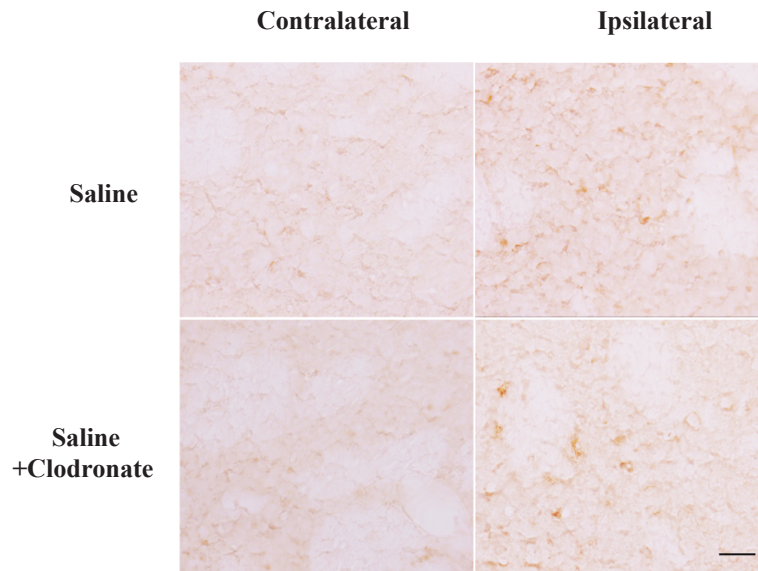

**Supplemental Figure III:** Immunoreactivity of Iba-1 in the ipsilateral basal ganglia at day-3 after injection of  $30\mu\text{l}$  saline with or without  $5\mu\text{l}$  clodronate liposome into the right basal ganglia, scale bar =  $20\mu\text{m}$ .
